# Supplementary material for: North Atlantic seasonal climate variability significantly modulates extreme winter Euro-Atlantic extratropical cyclone hazards
Source: Copernicus journal article supplement (doi:10.5194/egusphere-2025-1131), 2025-03-24
Supplement: Supplementary file [file egusphere-2025-1131-RC3-supplement.pdf]

# Review of egusphere-2025-1131

North Atlantic seasonal climate variability significantly modulates extreme winter Euro-Atlantic extratropical cyclone hazards

## Summary:

This paper is investigating meteorological parameters (wind, precipitation and wave swell) that are caused by European tropical cyclones and how they are influenced by atmospheric variability patterns as NAO or EA. Beside analysing a regression analysis for each variable they also look into compound events. Even though their compound is defined as extreme variables happening in the same season at the same location rather than at the same accurate time. This study is fully based on ERA5, meaning the result can be seen not as prediction skill but rather as atmospheric conditions.

This paper is an very interesting study with impact-based data. The results are important for different fields like insurances.

This study fits well into the NHESS-journal. In the following I have only a few comments or questions but nothing too major.

## Major Corrections:

Paragraph 2.3: You explain, that you use the maximum of each variable for each grid cell. I understand that this is giving very extreme values per season and I also see that neighbouring grid cells are not from the same storm. It think this is a fine way of doing it and it is well explained, but have you tried to use a seasonal average or sum per grid cell for your method? How are the results looking then? If you have tried it, maybe add a short paragraph, to show both sides.

Paragraph 3.1 (e.g. L198): here you are talking about "increase" and "decrease". I don't fully understand how you see the difference between increase and decrease, when your scale is from 0-25%. I guess I don't fully understand the "percentage anomalies from the climatology". Maybe a short explanation or equation in the supplementary material would help. I tried to write down an equation, but I believe this is not fully correct as this could result in negative values as well:

$$x = \frac{100 * (regression - climatology)}{climatology}$$

Paragraph 4: I like that this is quite dense, but for me the Discussion-part is a bit missing. I think this is more a summary and conclusion. I would like to have a few more sentences about how the results relate to other studies.

Fig. 5: Could you make more distinction with coloured here? Meaning for the "one var" panels, one colour for all grid cells where only wind is related, one colour for only precipitation, one colour for only wave swell and one colour, where not only one variable is related. Same for middle figures, one colour for grid cells that have wind-prec combination, one colour for wind-swell combination, one for prec-swell combination and one where more than one combination is related.

Fig. 7: It took me quite a while to understand the red dots. Maybe this is because I am not an English native speaker and the word "unitary" is explaining it fully. If not, I would consider to make it more clear that the red dots are predictions with your regressions for the case of PC1/PC2 +1/+1. I believe this is the statement in L245, but I think I would include it in the figure caption as well and make it very clear in the text.

## Minor Corrections:

L63: You introduce a new abbreviation for East Atlantic Pattern here, even though you have introduced one before. You also mainly use EAP instead of EA. I would choose one. (same in L139)

L100: Here you write "wave/swell height" but mostly it is "wave swell height" is there a difference? If not, I would use only one way.

L160: Shouldn't it be 2°W

L182: Shouldn't it be "are shown as percentage"

L185: We are in Section 3.1 here, do you mean something from section 2?

L191: For clarifications, I usually like it, when there are more often annotations about which figure you are currently talking. Meaning "parts of western UK (see Fig. 3a right)". This would help in more situations throughout the manuscript (e.g. L260, L266, L273)

L214: This is just an idea, but "shaded" is for me the grey area. Maybe "coloured" fits better here?

Paragraph starting L213: To clarify: this means the compound does not has to be at the same time, only in the same season?

L246: Here you use the wording "+1 PC1", in L255 you use PC1-, I think I like the second version more. But in general, just use one if they mean the same. Or if my comment above is correct, make it more clear that the first version explains the red dots.

References: It looks like you use different citation styles. I believe this will be unified in the type setting, just so you are aware.

Fig. 4: If I see it right, the maximum over all panels is roughly 70%. Have you tried to adjust the scale to 0-70%, to make the changes more clear?

Fig. 5: Maybe try white continent borders, especially for the "three var", the borders are hardly seen

Fig. 5 ("three vars"): Maybe include the grey mask to cover the land masses as used before for wave swell, as in the three vars version the land is definitely excluded because of the wave swell, right?

Fig. 6: Why do you start to have the lon/lat at the wave swell now? I think you don't need them, as you didn't had them before neither (same in Fig. 7)

## **Personal Note:**

I am happy to see my paper (Degenhardt et al., 2023) as reference in your study, but I have a bit the feeling at some points, that you are not agreeing with our way of analysis. I just wanted to state, that we are aware of the difference between discrete and continuous data, but because we are using seasonal averages per grid cell and also model member means we hardly have any discrete data. We also agree that linear models have to be used with caution, but we verified our results with a more flexible regression (Poisson) and the results didn't change (also stated in the paper last paragraph of section 3.3).
